# Supplementary material for: Fluorescent chemosensors for Hg2+ ions based on a pyridine-attached phenanthridine probe
Source: Royal Society of Chemistry journal article supplement (doi:10.1039/d1nj03561d), 2021-01-01

## Fluorescent chemosensor for Hg<sup>2+</sup> ions based on pyridine attached phenanthridine probe

Shanthi Seenan, Saravanakumar Manickam, and Sathiyarayanan Kulathu Iyer\*

\*Department of Chemistry, School of Advanced Sciences and Vellore Institute of Technology, Vellore-632014, India. E-mail: [sathiya\\_kuna@hotmail.com](mailto:sathiya_kuna@hotmail.com)

### Table of contents

---

|                                                                                                                                                                                                                |    |
|----------------------------------------------------------------------------------------------------------------------------------------------------------------------------------------------------------------|----|
| <b>SI Figure S1</b> TGA curve of sensor <b>4</b>                                                                                                                                                               | 2  |
| <b>SI Figure S2</b> pH and Interference studies of <b>4</b> with Hg <sup>2+</sup> ions                                                                                                                         | 2  |
| <b>SI Figure S3</b> Effect of response time on fluorescence intensity of <b>4a</b> with Hg <sup>2+</sup> ions                                                                                                  | 3  |
| <b>SI Figure S4</b> FTIR spectra of <b>4</b> in the presence of Hg <sup>2+</sup>                                                                                                                               | 3  |
| <b>SI Figure S5</b> <sup>1</sup> H and <sup>13</sup> C NMR spectra of <b>4</b>                                                                                                                                 | 4  |
| <b>SI Figure S6</b> HRMS spectrum of <b>4</b>                                                                                                                                                                  | 5  |
| <b>SI Figure S7</b> ESI-Mass spectra's of ligand <b>4</b> with Hg <sup>2+</sup> ion                                                                                                                            | 5  |
| <b>SI Figure S8</b> Optimized structure of probe <b>4</b> and <b>4</b> +Hg <sup>2+</sup> ion                                                                                                                   | 6  |
| <b>SI Table S1</b> Comparison of present sensor compound <b>4</b> with previous reports for Hg <sup>2+</sup> ion sensing                                                                                       | 7  |
| <b>SI Table S2</b> Crystal data and structure refinement for <b>4</b>                                                                                                                                          | 8  |
| <b>SI Table S3</b> Selected transitions achieved from TD-DFT calculation at B3LYP/6-31G**                                                                                                                      | 14 |
| <b>SI Table S4</b> Density surfaces of the frontier orbitals involved in electronic transitions of chromophores <b>4</b> , and <b>4</b> + Hg <sup>2+</sup> which is derived from B3LYP/6-31G** level of theory | 14 |

Sample: 4  
 Size: 2.1400 mg  
 Method: Ramp  
 Comment: RT-->800 @ 20°C/min N2 Purge=100mL/min

Instrument: SDT Q600 V20.9 Build 20

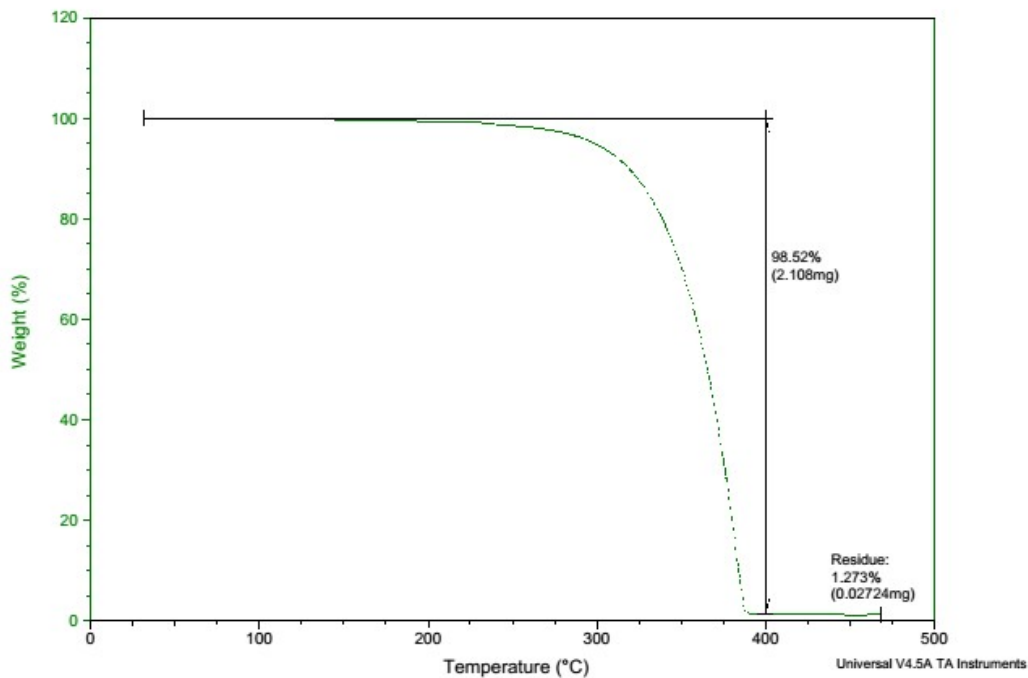

SI Figure S1 TGA curve of sensor 4

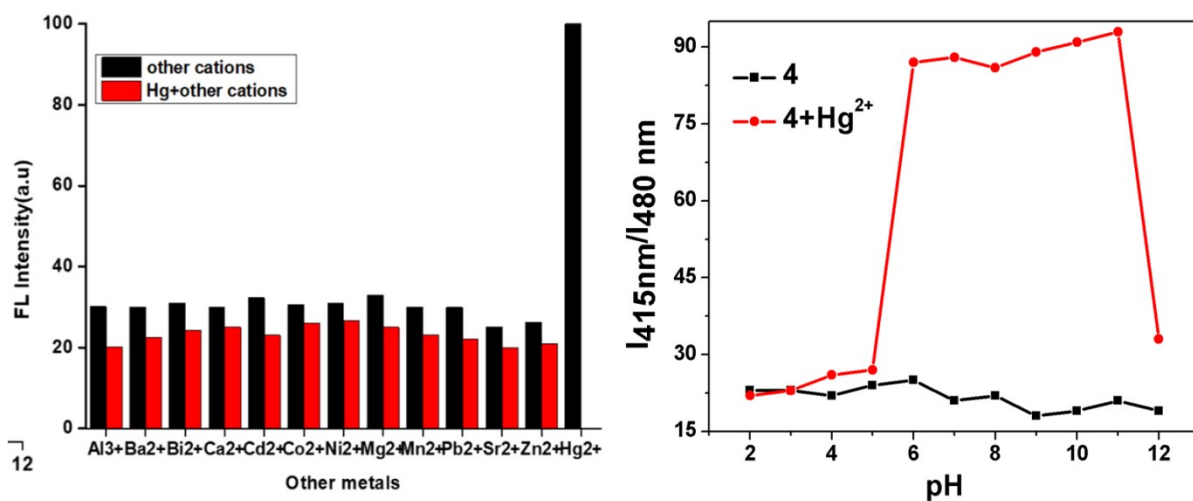

SI Figure S2 pH and Interference studies of 4 with Hg<sup>2+</sup> ions

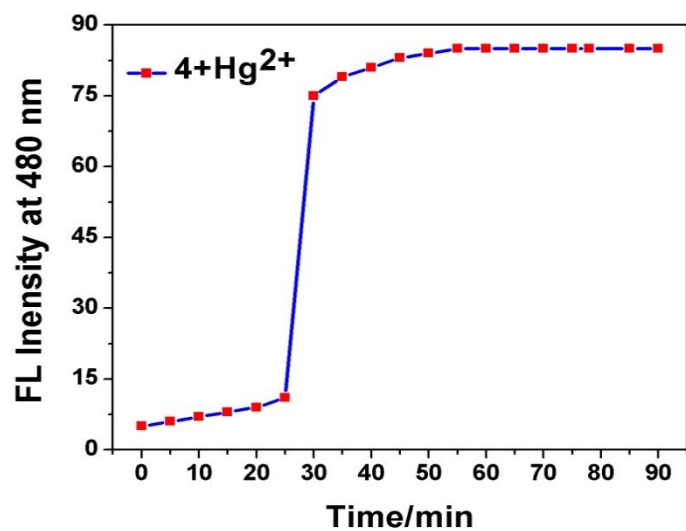

SI Figure S3 Effect of response time on fluorescence intensity of **4** with  $\text{Hg}^{2+}$  ions.

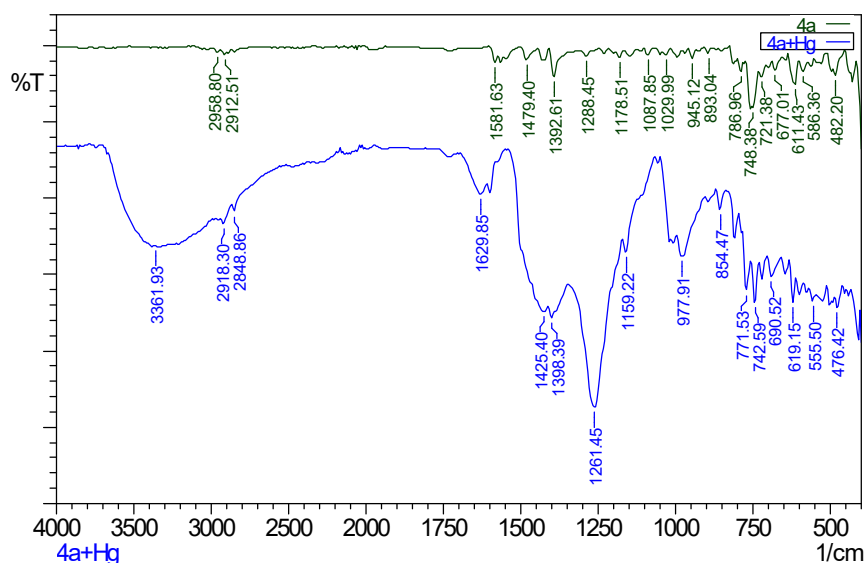

SI Figure S4 FTIR spectra of **4** in the presence of  $\text{Hg}^{2+}$

Signature SIF VIT VELLORE  
PUIRFDNH

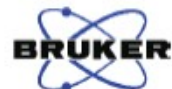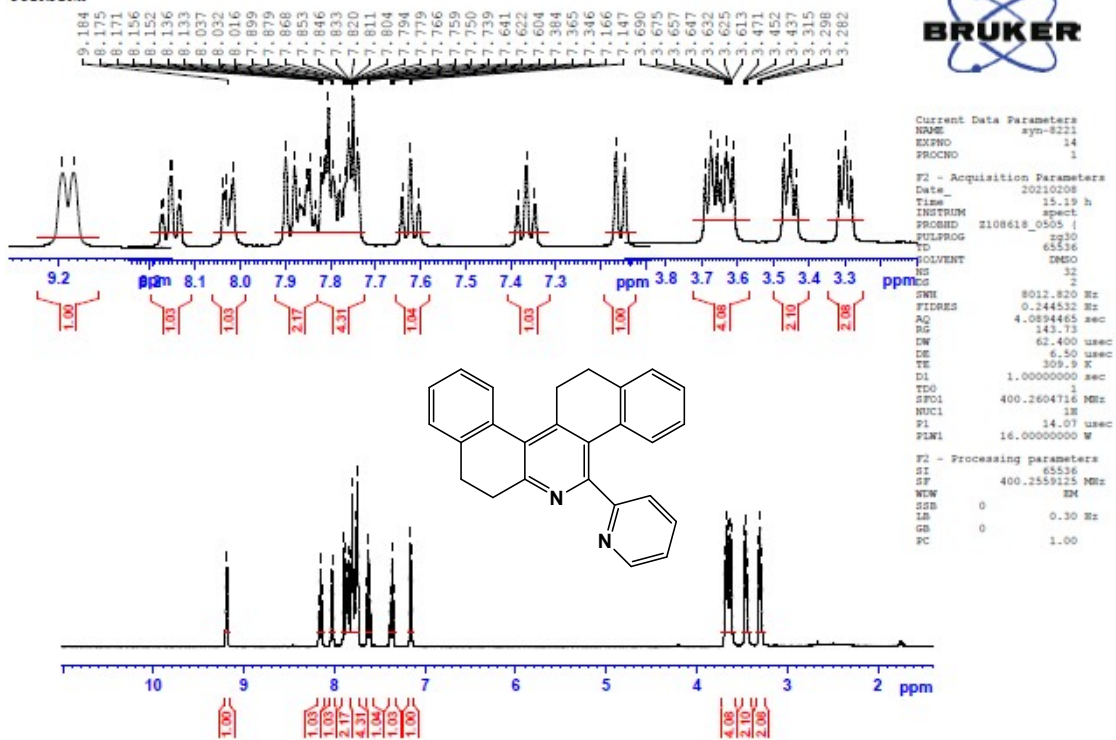

Signature SIF VIT VELLORE  
PUIRFDNH

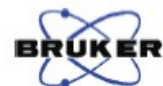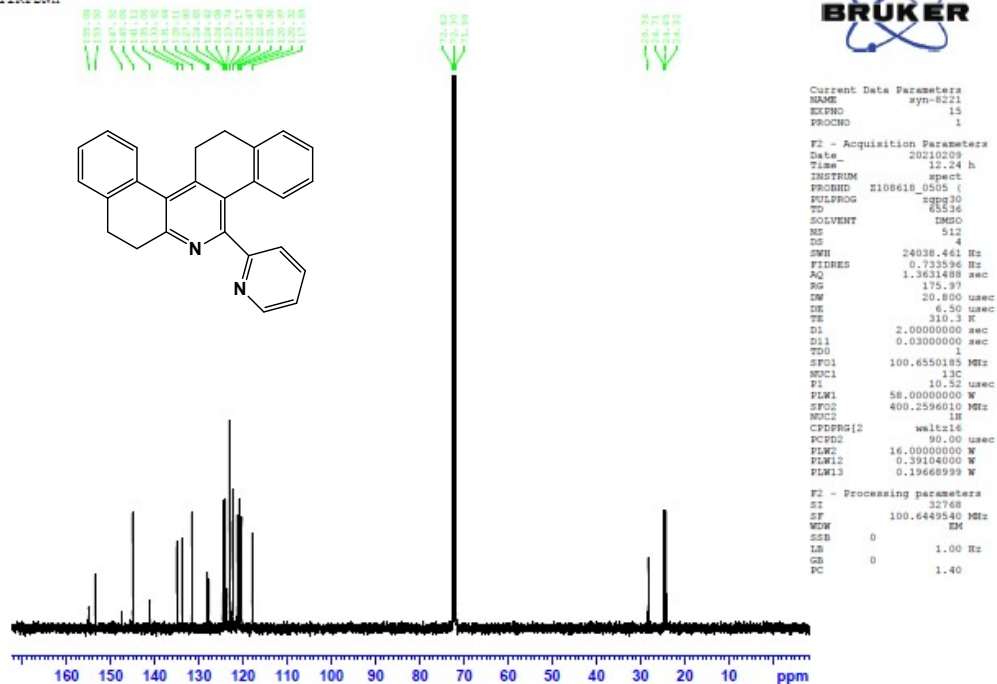

SI Figure S5 <sup>1</sup>H and <sup>13</sup>C NMR spectra of 4

**Molecular formula: C<sub>26</sub>H<sub>20</sub>N<sub>2</sub>**

**Calculated mass : 360.1626**

**Obtained mass : 360.1623**

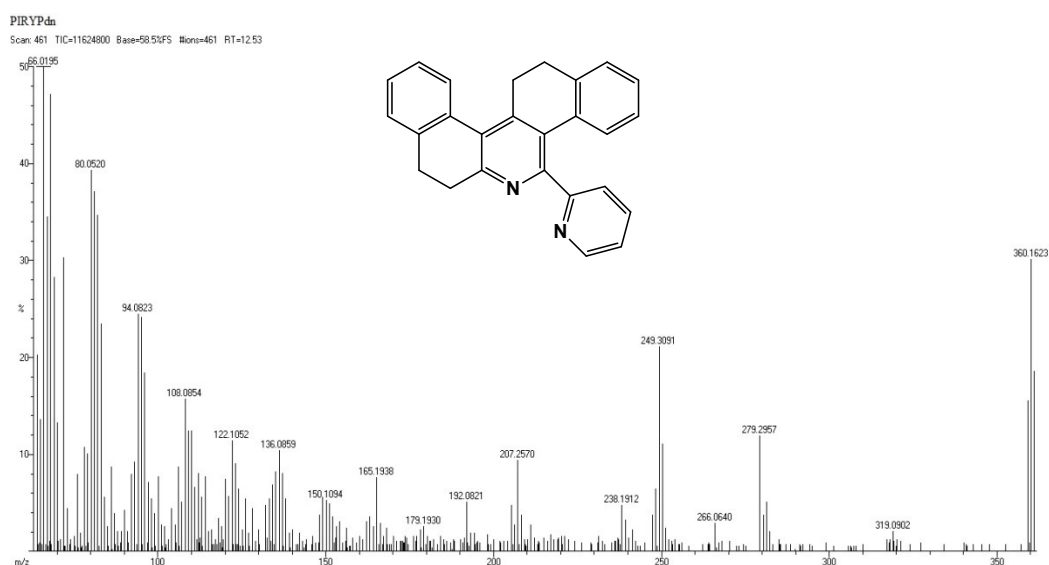

SI Figure S6 HRMS spectrum of 4

**Obtained mass: 702.1398**

**Calculated mass: 701.1324**

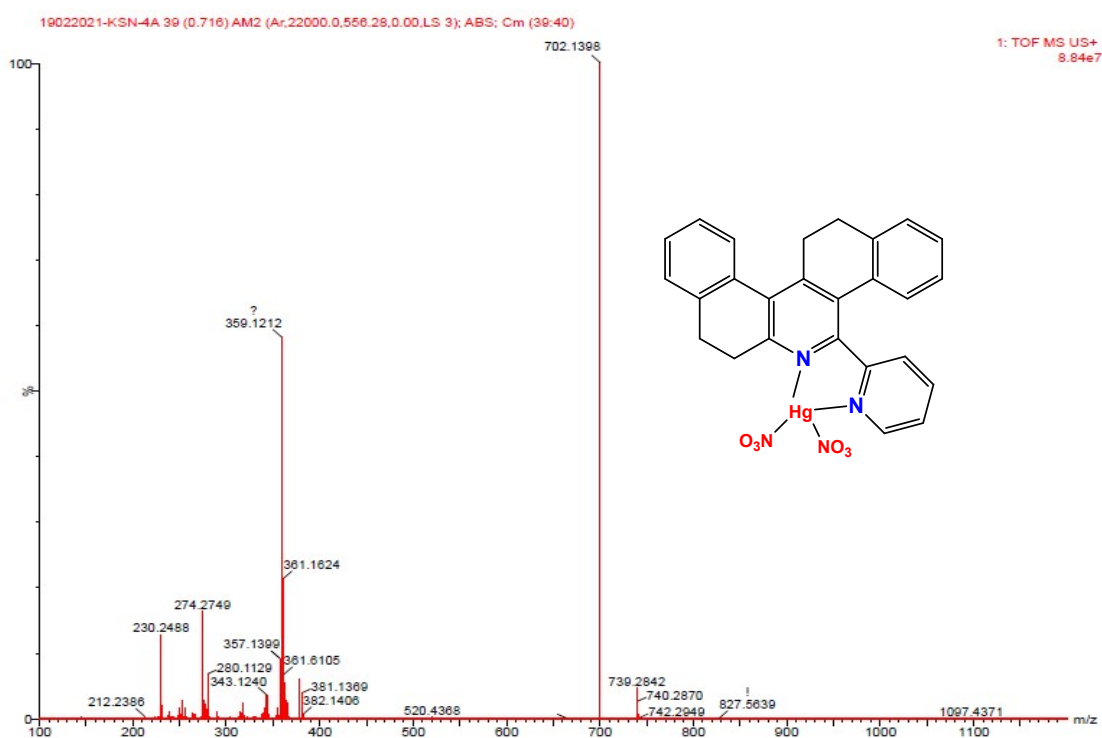

SI Figure S7 ESI-Mass spectra's of ligand 4 with Hg<sup>2+</sup> ion

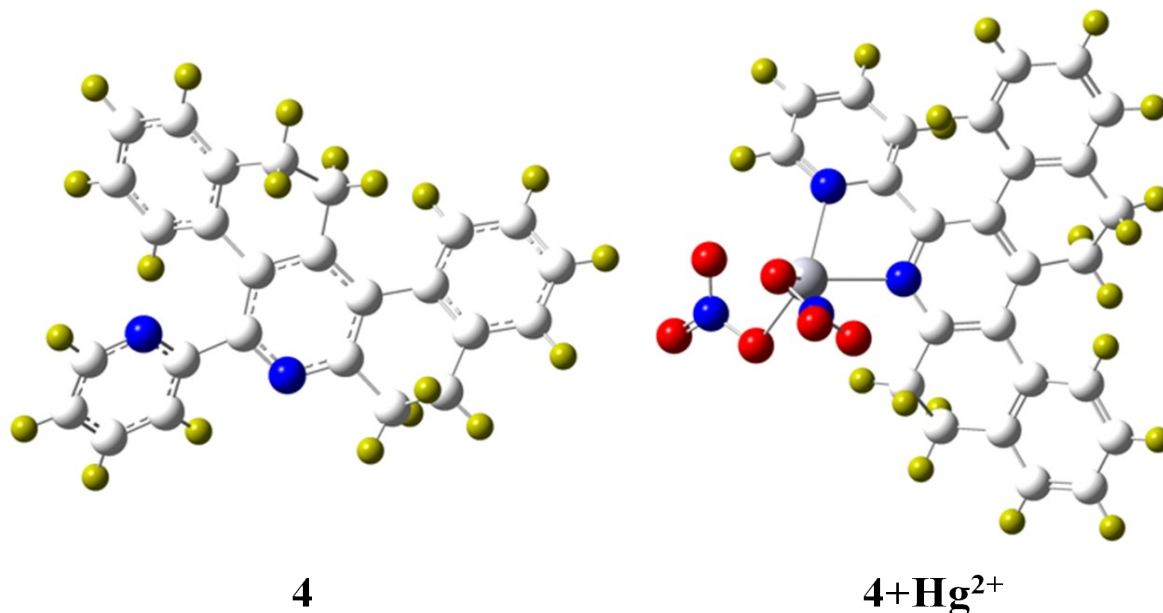

**SI Figure S8** Optimized structure of probe **4** and **4+Hg<sup>2+</sup>** ion

**SI Table S1** Comparison of present sensor compound **4** with previous reports for Hg<sup>2+</sup> ion sensing

| S.NO | Name of the probe                                   | Solvent                                   | Method                        | LOD     | Application  | Reference                                          |
|------|-----------------------------------------------------|-------------------------------------------|-------------------------------|---------|--------------|----------------------------------------------------|
| 1.   | Pyrene based Schiff base                            | DMSO/H <sub>2</sub> O<br>(v/v, 7/3)       | Colorimetric and fluorometric | 2.82 μM | Living cells | New J.Chem.,2015,39,2523-2531                      |
| 2.   | Condensation of Rhodamine hydrazone                 | Ethanol/Water<br>(3/7, v/v)               | Colorimetric and fluorometric | 0.30 μM | Cell image   | RSC Adv., 2015, 5, 21797-21802                     |
| 3.   | Invertase-functionalized gold-dendrimer nanospheres | PBS buffer                                | Glucometric                   | 4.2pM   | Real Sample  | Biosensors and Bioelectronics ,2016,77,681-686     |
| 4.   | poly(amidoamine) (PAMAM) dendrimer                  | PBS buffer                                | impedimetric                  | 0.4pM   | Real Sample  | Biosensors and Bioelectronics 2016,75, 108-115     |
| 5.   | Benzothiazole based Chemosensor                     | DMSO                                      | Colorimetric                  | 0.15 μM | No data      | Inorganic Chemistry Communications., 2016, 74, 1-5 |
| 6.   | BODIPY based Chemosensor                            | PBS buffer solutions containing 0.5% DMSO | Colorimetric and fluorometric | 49 nM   | Cell image   | Analyst, 2016, 141, 4789-4795                      |
| 7.   | Indole based BODIPY                                 | CH <sub>3</sub> CN                        | Colorimetric and fluorometric | 0.33 μM | Cell image   | RSC Adv., 2016, 6, 82810-82816                     |

|     |                                                                    |                                                |                               |                                                               |                           |                                                                         |
|-----|--------------------------------------------------------------------|------------------------------------------------|-------------------------------|---------------------------------------------------------------|---------------------------|-------------------------------------------------------------------------|
| 8.  | Rhodamine hydrazine based Chemosensor                              | EtOH/Water (2:1, v/v)                          | Colorimetric and fluorometric | 150 nM for Hg <sup>2+</sup> and 3.37 μM for Cu <sup>2+</sup>  | Real Sample               | Journal of Photochemistry and photobiology A: Chemistry 2016, 318, 7-13 |
| 9.  | DNA-scaffolded silver nanocluster                                  | phosphate buffer                               | fluorometric                  | 24pM                                                          | Real Sample               | Biosensors and Bioelectronics, 2016, 79,411-415.                        |
| 10. | Rhodamine derivative bearing Thiazole and thiocarbonyl moieties    | CH <sub>3</sub> CN/ HEPES buffer (3:7)         | Colorimetric and fluorometric | 0.134 μM for Hg <sup>2+</sup>                                 | Cell image                | Tetrahedron., 2017, 73, 5189-5193                                       |
| 11. | Pyrene based Chemosensor                                           | H <sub>2</sub> O /CH <sub>3</sub> CN (1:1)     | Colorimetric and fluorometric | 57 nM                                                         | Living Cells              | Sensors and Actuators: B. Chemical., 2018, 277, 673-678                 |
| 12. | Pyrazoline derivative based chemosensor                            | H <sub>2</sub> O                               | Colorimetric and fluorometric | 14.54 μM                                                      | No data                   | Sensors and Actuators: B. Chemical., 2018, 255, 814-825                 |
| 13. | Fluorescein based Chemosensor                                      | Buffer/MeOH (95/5, v/v)                        | Colorimetric and fluorometric | 0.110 μM                                                      | Living cells              | Inorganic Chemistry Communications., 2018, 89, 46-50                    |
| 14. | Triphenylamine appended Rhodamine                                  | CH <sub>3</sub> CN/H <sub>2</sub> O (v/v, 9/1) | Colorimetric and fluorometric | 0.48 μM for Hg <sup>2+</sup> and 71.8 nM for Al <sup>3+</sup> | Test paper strips         | Sensors and Actuators; B. Chemical., 2019, 290, 558-564                 |
| 15. | ultrathin two-dimensional MXenes (Ti <sub>3</sub> C <sub>2</sub> ) | Ultrathin nanosheets                           | fluorometric                  | 42.5 pM                                                       | Signal amplification      | Analyst, 2021 146, 2664-2669.                                           |
| 16. | Pyridine attached Phenanthridine moiety                            | CH <sub>3</sub> CN/H <sub>2</sub> O (8:2, v/v) | Colorimetric and fluorometric | 49.87 nM                                                      | Real sample and Bio-image | This work                                                               |

**SI Table S2** Crystal data and structure refinement for **4**

|                                   |                                                |                   |
|-----------------------------------|------------------------------------------------|-------------------|
| Identification code               | <b>4</b>                                       |                   |
| Empirical formula                 | C <sub>26</sub> H <sub>20</sub> N <sub>2</sub> |                   |
| Formula weight                    | 360.44                                         |                   |
| Temperature                       | 296(2) K                                       |                   |
| Wavelength                        | 0.71073 Å                                      |                   |
| Crystal system                    | Monoclinic                                     |                   |
| Space group                       | P 21/c                                         |                   |
| Unit cell dimensions              | a = 11.2948(5) Å                               | α = 90°.          |
|                                   | b = 15.2912(6) Å                               | β = 102.4061(18)° |
|                                   | c = 10.9882(3) Å                               | γ = 90°.          |
| Volume                            | 1853.47(12) Å <sup>3</sup>                     |                   |
| Z                                 | 4                                              |                   |
| Density (calculated)              | 1.292 Mg/m <sup>3</sup>                        |                   |
| Absorption coefficient            | 0.076 mm <sup>-1</sup>                         |                   |
| F(000)                            | 760                                            |                   |
| Crystal size                      | 0.250 x 0.160 x 0.100 mm <sup>3</sup>          |                   |
| Theta range for data collection   | 2.277 to 24.998°.                              |                   |
| Index ranges                      | -12 ≤ h ≤ 13, -17 ≤ k ≤ 18, -13 ≤ l ≤ 13       |                   |
| Reflections collected             | 13357                                          |                   |
| Independent reflections           | 3271 [R(int) = 0.0361]                         |                   |
| Completeness to theta = 24.998°   | 100.0 %                                        |                   |
| Absorption correction             | Semi-empirical from equivalents                |                   |
| Max. and min. transmission        | 0.992 and 0.981                                |                   |
| Refinement method                 | Full-matrix least-squares on F <sup>2</sup>    |                   |
| Data / restraints / parameters    | 3271 / 0 / 254                                 |                   |
| Goodness-of-fit on F <sup>2</sup> | 1.016                                          |                   |
| Final R indices [I > 2σ(I)]       | R1 = 0.0396, wR2 = 0.0857                      |                   |
| R indices (all data)              | R1 = 0.0719, wR2 = 0.1015                      |                   |
| Extinction coefficient            | 0.0130(13)                                     |                   |
| Largest diff. peak and hole       | 0.170 and -0.128 e.Å <sup>-3</sup>             |                   |



Atomic coordinates ( $\times 10^4$ ) and equivalent isotropic displacement parameters ( $\text{\AA}^2 \times 10^3$ ) for pyrpdn.  $U(\text{eq})$  is defined as one third of the trace of the orthogonalized  $U^{ij}$  tensor.

| Atom  | x        | y        | z        | $U(\text{eq})$ |
|-------|----------|----------|----------|----------------|
| C(1)  | 8924(2)  | 9665(1)  | 6599(1)  | 39(1)          |
| C(2)  | 8174(2)  | 10027(1) | 5410(2)  | 48(1)          |
| C(3)  | 7344(2)  | 9336(1)  | 4703(2)  | 53(1)          |
| C(4)  | 6612(2)  | 8912(1)  | 5526(2)  | 46(1)          |
| C(5)  | 5404(2)  | 8686(1)  | 5088(2)  | 65(1)          |
| C(6)  | 4722(2)  | 8340(1)  | 5865(2)  | 73(1)          |
| C(7)  | 5236(2)  | 8235(1)  | 7109(2)  | 64(1)          |
| C(8)  | 6431(2)  | 8448(1)  | 7563(2)  | 50(1)          |
| C(9)  | 7156(2)  | 8764(1)  | 6779(2)  | 41(1)          |
| C(10) | 8449(2)  | 8996(1)  | 7229(1)  | 37(1)          |
| C(11) | 9238(2)  | 8606(1)  | 8249(1)  | 37(1)          |
| C(12) | 8944(2)  | 7765(1)  | 8847(2)  | 45(1)          |
| C(13) | 10089(2) | 7230(1)  | 9281(2)  | 50(1)          |
| C(14) | 10991(2) | 7755(1)  | 10185(2) | 44(1)          |
| C(15) | 11635(2) | 7427(1)  | 11309(2) | 55(1)          |
| C(16) | 12407(2) | 7951(2)  | 12138(2) | 60(1)          |
| C(17) | 12537(2) | 8818(1)  | 11861(2) | 55(1)          |
| C(18) | 11898(2) | 9162(1)  | 10752(1) | 46(1)          |
| C(19) | 11133(2) | 8637(1)  | 9888(1)  | 39(1)          |
| C(20) | 10384(2) | 8979(1)  | 8701(1)  | 36(1)          |
| C(21) | 10743(2) | 9666(1)  | 8019(1)  | 38(1)          |
| C(22) | 11955(2) | 10093(1) | 8323(1)  | 39(1)          |
| C(23) | 14012(2) | 10001(1) | 8570(2)  | 56(1)          |
| C(24) | 14162(2) | 10880(1) | 8813(2)  | 56(1)          |
| C(25) | 13146(2) | 11372(1) | 8800(2)  | 53(1)          |
| C(26) | 12033(2) | 10978(1) | 8537(2)  | 43(1)          |
| N(1)  | 10036(1) | 9989(1)  | 6976(1)  | 41(1)          |
| N(2)  | 12931(1) | 9591(1)  | 8336(1)  | 51(1)          |

---

Bond lengths [ $\text{\AA}$ ] and angles [ $^\circ$ ] for pyrpdn.

| Atom         | Bond Lengths |
|--------------|--------------|
| C(1)-N(1)    | 1.331(2)     |
| C(1)-C(10)   | 1.404(2)     |
| C(1)-C(2)    | 1.502(2)     |
| C(2)-C(3)    | 1.512(2)     |
| C(2)-H(2A)   | 0.9700       |
| C(2)-H(2B)   | 0.9700       |
| C(3)-C(4)    | 1.498(2)     |
| C(3)-H(3A)   | 0.9700       |
| C(3)-H(3B)   | 0.9700       |
| C(4)-C(5)    | 1.389(2)     |
| C(4)-C(9)    | 1.401(2)     |
| C(5)-C(6)    | 1.373(3)     |
| C(5)-H(5)    | 0.9300       |
| C(6)-C(7)    | 1.375(3)     |
| C(6)-H(6)    | 0.9300       |
| C(7)-C(8)    | 1.374(2)     |
| C(7)-H(7)    | 0.9300       |
| C(8)-C(9)    | 1.395(2)     |
| C(8)-H(8)    | 0.9300       |
| C(9)-C(10)   | 1.481(2)     |
| C(10)-C(11)  | 1.405(2)     |
| C(11)-C(20)  | 1.404(2)     |
| C(11)-C(12)  | 1.513(2)     |
| C(12)-C(13)  | 1.518(2)     |
| C(12)-H(12A) | 0.9700       |
| C(12)-H(12B) | 0.9700       |
| C(13)-C(14)  | 1.496(2)     |
| C(13)-H(13A) | 0.9700       |
| C(13)-H(13B) | 0.9700       |
| C(14)-C(15)  | 1.386(2)     |
| C(14)-C(19)  | 1.405(2)     |
| C(15)-C(16)  | 1.375(3)     |
| C(15)-H(15)  | 0.9300       |
| C(16)-C(17)  | 1.375(3)     |
| C(16)-H(16)  | 0.9300       |
| C(17)-C(18)  | 1.379(2)     |
| C(17)-H(17)  | 0.9300       |

|             |            |
|-------------|------------|
| C(18)-C(19) | 1.392(2)   |
| C(18)-H(18) | 0.9300     |
| C(19)-C(20) | 1.489(2)   |
| C(20)-C(21) | 1.401(2)   |
| C(21)-N(1)  | 1.3428(19) |
| C(21)-C(22) | 1.489(2)   |
| C(22)-N(2)  | 1.341(2)   |
| C(22)-C(26) | 1.372(2)   |
| C(23)-N(2)  | 1.348(2)   |
| C(23)-C(24) | 1.373(3)   |
| C(23)-H(23) | 0.9300     |
| C(24)-C(25) | 1.370(3)   |
| C(24)-H(24) | 0.9300     |
| C(25)-C(26) | 1.368(2)   |
| C(25)-H(25) | 0.9300     |
| C(26)-H(26) | 0.9300     |

| Atom             | Bond Angle |
|------------------|------------|
| N(1)-C(1)-C(10)  | 123.52(15) |
| N(1)-C(1)-C(2)   | 116.82(15) |
| C(10)-C(1)-C(2)  | 119.62(16) |
| C(1)-C(2)-C(3)   | 111.08(14) |
| C(1)-C(2)-H(2A)  | 109.4      |
| C(3)-C(2)-H(2A)  | 109.4      |
| C(1)-C(2)-H(2B)  | 109.4      |
| C(3)-C(2)-H(2B)  | 109.4      |
| H(2A)-C(2)-H(2B) | 108.0      |
| C(4)-C(3)-C(2)   | 110.77(14) |
| C(4)-C(3)-H(3A)  | 109.5      |
| C(2)-C(3)-H(3A)  | 109.5      |
| C(4)-C(3)-H(3B)  | 109.5      |
| C(2)-C(3)-H(3B)  | 109.5      |
| H(3A)-C(3)-H(3B) | 108.1      |
| C(5)-C(4)-C(9)   | 119.44(17) |
| C(5)-C(4)-C(3)   | 121.80(16) |
| C(9)-C(4)-C(3)   | 118.73(16) |
| C(6)-C(5)-C(4)   | 121.34(19) |
| C(6)-C(5)-H(5)   | 119.3      |
| C(4)-C(5)-H(5)   | 119.3      |

|                     |            |
|---------------------|------------|
| C(5)-C(6)-C(7)      | 119.4(2)   |
| C(5)-C(6)-H(6)      | 120.3      |
| C(7)-C(6)-H(6)      | 120.3      |
| C(8)-C(7)-C(6)      | 120.33(19) |
| C(8)-C(7)-H(7)      | 119.8      |
| C(6)-C(7)-H(7)      | 119.8      |
| C(7)-C(8)-C(9)      | 121.27(18) |
| C(7)-C(8)-H(8)      | 119.4      |
| C(9)-C(8)-H(8)      | 119.4      |
| C(8)-C(9)-C(4)      | 118.09(16) |
| C(8)-C(9)-C(10)     | 122.99(15) |
| C(4)-C(9)-C(10)     | 118.82(15) |
| C(1)-C(10)-C(11)    | 117.28(15) |
| C(1)-C(10)-C(9)     | 117.62(14) |
| C(11)-C(10)-C(9)    | 125.09(15) |
| C(20)-C(11)-C(10)   | 119.24(15) |
| C(20)-C(11)-C(12)   | 117.55(14) |
| C(10)-C(11)-C(12)   | 123.10(15) |
| C(11)-C(12)-C(13)   | 110.10(14) |
| C(11)-C(12)-H(12A)  | 109.6      |
| C(13)-C(12)-H(12A)  | 109.6      |
| C(11)-C(12)-H(12B)  | 109.6      |
| C(13)-C(12)-H(12B)  | 109.6      |
| H(12A)-C(12)-H(12B) | 108.2      |
| C(14)-C(13)-C(12)   | 109.39(15) |
| C(14)-C(13)-H(13A)  | 109.8      |
| C(12)-C(13)-H(13A)  | 109.8      |
| C(14)-C(13)-H(13B)  | 109.8      |
| C(12)-C(13)-H(13B)  | 109.8      |
| H(13A)-C(13)-H(13B) | 108.2      |
| C(15)-C(14)-C(19)   | 119.39(17) |
| C(15)-C(14)-C(13)   | 123.33(16) |
| C(19)-C(14)-C(13)   | 117.20(14) |
| C(16)-C(15)-C(14)   | 121.03(18) |
| C(16)-C(15)-H(15)   | 119.5      |
| C(14)-C(15)-H(15)   | 119.5      |
| C(17)-C(16)-C(15)   | 119.86(17) |
| C(17)-C(16)-H(16)   | 120.1      |
| C(15)-C(16)-H(16)   | 120.1      |

|                   |            |
|-------------------|------------|
| C(16)-C(17)-C(18) | 120.16(18) |
| C(16)-C(17)-H(17) | 119.9      |
| C(18)-C(17)-H(17) | 119.9      |
| C(17)-C(18)-C(19) | 120.87(18) |
| C(17)-C(18)-H(18) | 119.6      |
| C(19)-C(18)-H(18) | 119.6      |
| C(18)-C(19)-C(14) | 118.66(15) |
| C(18)-C(19)-C(20) | 123.27(15) |
| C(14)-C(19)-C(20) | 117.91(15) |
| C(21)-C(20)-C(11) | 117.81(14) |
| C(21)-C(20)-C(19) | 123.78(15) |
| C(11)-C(20)-C(19) | 118.40(14) |
| N(1)-C(21)-C(20)  | 123.01(15) |
| N(1)-C(21)-C(22)  | 112.32(14) |
| C(20)-C(21)-C(22) | 124.61(14) |
| N(2)-C(22)-C(26)  | 122.76(16) |
| N(2)-C(22)-C(21)  | 117.67(15) |
| C(26)-C(22)-C(21) | 119.53(15) |
| N(2)-C(23)-C(24)  | 124.19(18) |
| N(2)-C(23)-H(23)  | 117.9      |
| C(24)-C(23)-H(23) | 117.9      |
| C(25)-C(24)-C(23) | 117.83(18) |
| C(25)-C(24)-H(24) | 121.1      |
| C(23)-C(24)-H(24) | 121.1      |
| C(26)-C(25)-C(24) | 119.36(18) |
| C(26)-C(25)-H(25) | 120.3      |
| C(24)-C(25)-H(25) | 120.3      |
| C(25)-C(26)-C(22) | 119.50(17) |
| C(25)-C(26)-H(26) | 120.3      |
| C(22)-C(26)-H(26) | 120.3      |
| C(1)-N(1)-C(21)   | 118.53(14) |
| (22)-N(2)-C(23)   | 116.32(16) |

Anisotropic displacement parameters ( $\text{\AA}^2 \times 10^3$ ) for pyrpdn. The anisotropic displacement factor exponent takes the form:  $-2\pi^2 [ h^2 a^{*2} U^{11} + \dots + 2 h k a^* b^* U^{12} ]$

| Atom | $U^{11}$ | $U^{22}$ | $U^{33}$ | $U^{23}$ | $U^{13}$ | $U^{12}$ |
|------|----------|----------|----------|----------|----------|----------|
| C(1) | 46(1)    | 36(1)    | 35(1)    | -1(1)    | 10(1)    | 3(1)     |
| C(2) | 52(1)    | 51(1)    | 40(1)    | 6(1)     | 8(1)     | 2(1)     |
| C(3) | 52(1)    | 62(1)    | 41(1)    | 1(1)     | 2(1)     | 5(1)     |

|       |       |       |       |       |       |        |
|-------|-------|-------|-------|-------|-------|--------|
| C(4)  | 41(1) | 43(1) | 51(1) | -1(1) | 5(1)  | 6(1)   |
| C(5)  | 49(1) | 68(2) | 70(1) | 8(1)  | -5(1) | 0(1)   |
|       |       |       |       |       |       |        |
| C(6)  | 39(1) | 78(2) | 97(2) | 10(1) | 3(1)  | -3(1)  |
| C(7)  | 43(1) | 66(1) | 87(2) | 4(1)  | 24(1) | 1(1)   |
| C(8)  | 45(1) | 48(1) | 58(1) | 1(1)  | 17(1) | 4(1)   |
| C(9)  | 41(1) | 34(1) | 47(1) | -4(1) | 11(1) | 3(1)   |
| C(10) | 41(1) | 35(1) | 36(1) | -4(1) | 9(1)  | 2(1)   |
| C(11) | 43(1) | 32(1) | 37(1) | -2(1) | 13(1) | 2(1)   |
| C(12) | 47(1) | 39(1) | 49(1) | 3(1)  | 14(1) | 0(1)   |
| C(13) | 54(1) | 37(1) | 63(1) | 10(1) | 17(1) | 2(1)   |
| C(14) | 44(1) | 44(1) | 46(1) | 9(1)  | 15(1) | 8(1)   |
| C(15) | 58(1) | 56(1) | 56(1) | 19(1) | 22(1) | 15(1)  |
| C(16) | 57(1) | 81(2) | 42(1) | 16(1) | 12(1) | 23(1)  |
| C(17) | 52(1) | 74(2) | 38(1) | -2(1) | 7(1)  | 11(1)  |
| C(18) | 51(1) | 49(1) | 38(1) | 0(1)  | 9(1)  | 3(1)   |
| C(19) | 40(1) | 42(1) | 37(1) | 2(1)  | 12(1) | 4(1)   |
| C(20) | 44(1) | 31(1) | 34(1) | -2(1) | 10(1) | 2(1)   |
| C(21) | 44(1) | 33(1) | 35(1) | -3(1) | 10(1) | 1(1)   |
| C(22) | 46(1) | 38(1) | 31(1) | 2(1)  | 8(1)  | 0(1)   |
| C(23) | 48(1) | 66(2) | 50(1) | 1(1)  | 4(1)  | 4(1)   |
| C(24) | 52(1) | 64(2) | 49(1) | 2(1)  | 1(1)  | -16(1) |
| C(25) | 62(1) | 46(1) | 49(1) | 2(1)  | 5(1)  | -12(1) |
| C(26) | 48(1) | 35(1) | 47(1) | -1(1) | 9(1)  | -1(1)  |
| N(1)  | 46(1) | 40(1) | 38(1) | 2(1)  | 8(1)  | -2(1)  |
| N(2)  | 51(1) | 52(1) | 48(1) | -1(1) | 6(1)  | 3(1)   |

**SI Table S3** Selected transitions achieved from TD-DFT calculation at B3LYP/6-31G\*\*

| Entry                | $\lambda$ max (nm) | Oscillatory strength | $\Delta E$ , Energy (eV) | Selected major transitions                          |
|----------------------|--------------------|----------------------|--------------------------|-----------------------------------------------------|
| 4                    | 345                | 0.0055               | 5.62                     | H $\rightarrow$ L (45%)                             |
|                      | 292                | 0.0164               | 6.29                     | H <sub>3</sub> $\rightarrow$ L <sub>1</sub> (27%)   |
|                      | 279                | 0.0257               | 6.80                     | H <sub>4</sub> $\rightarrow$ L <sub>1</sub> (24%)   |
|                      | 229                | 0.0235               | 7.39                     | H <sub>4</sub> $\rightarrow$ L <sub>3</sub> (14.7%) |
|                      | 240                | 0.1551               | 7.71                     | H <sub>3</sub> $\rightarrow$ L <sub>2</sub> (14%)   |
|                      | 271                | 0.1038               | 5.69                     | H <sub>2</sub> $\rightarrow$ L <sub>1</sub> (38%)   |
| 4 + Hg <sup>2+</sup> | 360                | 0.2996               | 2.46                     | H $\rightarrow$ L (27%)                             |
|                      | 318                | 0.0369               | 4.26                     | H <sub>3</sub> $\rightarrow$ L <sub>1</sub> (32%)   |
|                      | 292                | 0.0090               | 3.45                     | H <sub>4</sub> $\rightarrow$ L <sub>2</sub> (17%)   |
|                      | 287                | 0.0009               | 4.41                     | H <sub>4</sub> $\rightarrow$ L <sub>3</sub> (37%)   |
|                      | 354                | 0.0017               | 3.93                     | H <sub>2</sub> $\rightarrow$ L <sub>4</sub> (35%)   |
|                      | 356                | 0.0031               | 2.74                     | H $\rightarrow$ L <sub>1</sub> (23%)                |

**SI Table S4** Density surfaces of the frontier orbitals involved in electronic transitions of chromophores **4**, and **4 + Hg<sup>2+</sup>** which is derived from B3LYP/6-31G\*\* level of theory

| Orbitals | 4 | 4+Hg <sup>2+</sup> |
|----------|---|--------------------|
| Homo     |   |                    |
| Homo-1   |   |                    |
| Homo-2   |   |                    |
| Homo-3   |   |                    |
|          |   |                    |

|          |                                                                                      |                                                                                       |
|----------|--------------------------------------------------------------------------------------|---------------------------------------------------------------------------------------|
|          |                                                                                      |                                                                                       |
| Homo-4   | 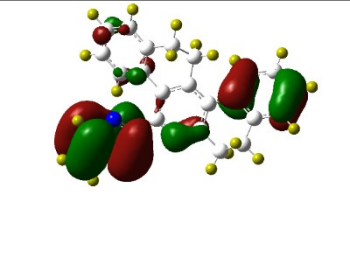   |    |
| Homo - 5 |    |    |
| Lumo     |    |    |
| Lumo-1   |   |   |
| Lumo-2   |  |  |
| Lumo-3   |  |  |
| Lumo-4   |  |  |



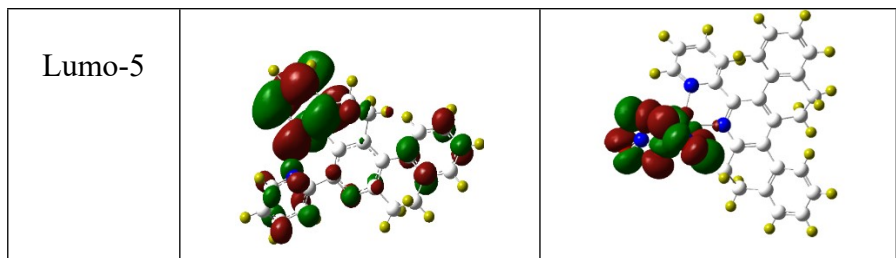

Supplement: d1nj03561d1.pdf [file d1nj03561d1.pdf]
